# Supplementary material for: Synthesis of a 2,2'-Bipyridyl Functionalized Oligovinylene-Phenylene Using Heck and Horner-Wadsworth-Emmons Reactions and X-ray Crystal Structure of E-(4-(4-Bromostyryl)phenyl)(methyl)sulfane
Source: Molecules. 2012 May 14;17(5):5724–32. doi: 10.3390/molecules17055724 (PMC6268687; doi:10.3390/molecules17055724)
Supplement: Supplementary file 1 [file molecules-17-05724-s001.cif]

data_andy01b 

_audit_update_record
;
2011-04-18 # Formatted by publCIF
;
 
_audit_creation_method            SHELXL-97 
_chemical_name_systematic 
? 
_chemical_name_common             ? 
_chemical_melting_point           ? 
_chemical_formula_moiety          ? 
_chemical_formula_sum             'C15 H13 Br S' 
_chemical_formula_weight          305.22 
 
loop_ 
 _atom_type_symbol 
 _atom_type_description 
 _atom_type_scat_dispersion_real 
 _atom_type_scat_dispersion_imag 
 _atom_type_scat_source 
 'C'  'C'   0.0033   0.0016 
 'International Tables Vol C Tables 4.2.6.8 and 6.1.1.4' 
 'H'  'H'   0.0000   0.0000 
 'International Tables Vol C Tables 4.2.6.8 and 6.1.1.4' 
 'S'  'S'   0.1246   0.1234 
 'International Tables Vol C Tables 4.2.6.8 and 6.1.1.4' 
 'Br'  'Br'  -0.2901   2.4595 
 'International Tables Vol C Tables 4.2.6.8 and 6.1.1.4' 
 
_symmetry_cell_setting           monoclinic
_symmetry_space_group_name_H-M   'C 2/c'
 
loop_ 
 _symmetry_equiv_pos_as_xyz 
 'x, y, z' 
 '-x, y, -z+1/2' 
 'x+1/2, y+1/2, z' 
 '-x+1/2, y+1/2, -z+1/2' 
 '-x, -y, -z' 
 'x, -y, z-1/2' 
 '-x+1/2, -y+1/2, -z' 
 'x+1/2, -y+1/2, z-1/2' 
 
_cell_length_a                    30.840(3) 
_cell_length_b                    7.1498(7) 
_cell_length_c                    5.8545(6) 
_cell_angle_alpha                 90.00 
_cell_angle_beta                  96.531(3) 
_cell_angle_gamma                 90.00 
_cell_volume                      1282.5(2) 
_cell_formula_units_Z             4 
_cell_measurement_temperature     100(2) 
_cell_measurement_reflns_used    3095
_cell_measurement_theta_min        2.66
_cell_measurement_theta_max       29.06
 
_exptl_crystal_description       'hexagonal plate'
_exptl_crystal_colour            'colourless'
_exptl_crystal_size_min          0.097
_exptl_crystal_size_mid          0.234
_exptl_crystal_size_max          0.531
_exptl_crystal_density_meas       ? 
_exptl_crystal_density_diffrn     1.581 
_exptl_crystal_density_method     'not measured' 
_exptl_crystal_F_000              616 
_exptl_absorpt_coefficient_mu     3.341 
##############################################################################
#                                                                            #
#  NOTE on absorbtion correction with SADABS:                                #
#                                                                            #
#  (Semi)empirical correction methods for absorption correction are more of  #
#  a problem in that they often specify only a relative correction range     #
#  [ Tmin(emp) & Tmax(emp)].                                                 #
#                                                                            #
#  Acta Cryst. procedures call in such cases for the multiplication of both  #
#  empirical values with Tmax(expected).                                     #
#                                                                            #
#  THIS RECOMMENDATION IS CURRENTLY UNDER REVIEW!  (George                   #
#  and Ton are agruing this point!)                                          #
#                                                                            #
##############################################################################
_exptl_absorpt_correction_type    multi-scan
_exptl_absorpt_process_details    'SADABS v2008/1 (Bruker, 2007)'
_exptl_absorpt_correction_T_min   0.2700 
_exptl_absorpt_correction_T_max   0.7376 
 
_exptl_special_details 
? 
 
_diffrn_ambient_temperature       100(2) 
# APEX 2 parameters
_diffrn_radiation_wavelength      0.71073 
_diffrn_radiation_type           'MoK\a'
_diffrn_radiation_source         'fine-focus sealed tube'
_diffrn_radiation_monochromator   graphite 
_diffrn_measurement_device_type  'Bruker SMART APEX II CCD'
_diffrn_measurement_method       '\w scans'
_diffrn_detector_area_resol_mean  ? 
_diffrn_standards_number          ? 
_diffrn_standards_interval_count  ? 
_diffrn_standards_interval_time   ? 
_diffrn_standards_decay_%         ? 
_diffrn_reflns_number             6560 
_diffrn_reflns_av_R_equivalents   0.0203 
_diffrn_reflns_av_sigmaI/netI     0.0180 
_diffrn_reflns_limit_h_min        -41 
_diffrn_reflns_limit_h_max        42 
_diffrn_reflns_limit_k_min        -8 
_diffrn_reflns_limit_k_max        9 
_diffrn_reflns_limit_l_min        -8 
_diffrn_reflns_limit_l_max        7 
_diffrn_reflns_theta_min          2.66 
_diffrn_reflns_theta_max          29.12 
_reflns_number_total              1685 
_reflns_number_gt                 1478 
_reflns_threshold_expression      I>2\s(I)
 
_computing_data_collection        'Bruker APEX2 v2.1-0 (Bruker, 2006)'
_computing_cell_refinement        'Bruker APEX2 v2.1-0 (Bruker, 2006)'
_computing_data_reduction         
;
Bruker SAINT v7.34A (Bruker, 2005), Bruker XPREP v2005/2 (Bruker, 2004)
;
_computing_structure_solution     'Bruker SHELXTL v6.12 (Bruker, 2000b)' 
_computing_structure_refinement   'Bruker SHELXTL v6.12 (Bruker, 2000b)' 
_computing_molecular_graphics     'Bruker SHELXTL v6.12 (Bruker, 2000b)'
_computing_publication_material   'Bruker SHELXTL v6.12 (Bruker, 2000b)'
 
_refine_special_details 
; 
 Refinement of F^2^ against ALL reflections.  The weighted R-factor wR and 
 goodness of fit S are based on F^2^, conventional R-factors R are based 
 on F, with F set to zero for negative F^2^. The threshold expression of 
 F^2^ > 2sigma(F^2^) is used only for calculating R-factors(gt) etc. and is 
 not relevant to the choice of reflections for refinement.  R-factors based 
 on F^2^ are statistically about twice as large as those based on F, and R- 
 factors based on ALL data will be even larger. 
; 
 
_refine_ls_structure_factor_coef  Fsqd  
_refine_ls_matrix_type            full 
_refine_ls_weighting_scheme       calc  
_refine_ls_weighting_details 
 'calc w=1/[\s^2^(Fo^2^)+(0.1109P)^2^+4.0101P] where P=(Fo^2^+2Fc^2^)/3' 
_atom_sites_solution_primary      direct 
_atom_sites_solution_secondary    difmap 
_atom_sites_solution_hydrogens    geom 
_refine_ls_hydrogen_treatment     mixed 
_refine_ls_extinction_method      none 
_refine_ls_extinction_coef        ? 
_refine_ls_number_reflns          1685 
_refine_ls_number_parameters      103 
_refine_ls_number_restraints      9 
_refine_ls_R_factor_all           0.0643 
_refine_ls_R_factor_gt            0.0581 
_refine_ls_wR_factor_ref          0.1763 
_refine_ls_wR_factor_gt           0.1699 
_refine_ls_goodness_of_fit_ref    1.038 
_refine_ls_restrained_S_all       1.042 
_refine_ls_shift/su_max           0.019 
_refine_ls_shift/su_mean          0.001 
 
loop_ 
 _atom_site_label 
 _atom_site_type_symbol 
 _atom_site_fract_x 
 _atom_site_fract_y 
 _atom_site_fract_z 
 _atom_site_U_iso_or_equiv 
 _atom_site_adp_type 
 _atom_site_occupancy 
 _atom_site_symmetry_multiplicity 
 _atom_site_calc_flag 
 _atom_site_refinement_flags 
 _atom_site_disorder_assembly 
 _atom_site_disorder_group 
Br1 Br 0.44541(3) 0.79702(18) 0.0949(2) 0.0381(3) Uani 0.50 1 d P A 1 
S1 S 0.44409(8) 0.7881(6) 0.0453(5) 0.0728(15) Uani 0.50 1 d PD A 2 
C1A C 0.48101(9) 0.7306(4) -0.1459(6) 0.069(3) Uani 0.50 1 d PD . 2 
H1AA H 0.51073(14) 0.7452(12) -0.079(2) 0.103 Uiso 0.50 1 d PD B 2 
H1AB H 0.4762(4) 0.6037(5) -0.196(2) 0.103 Uiso 0.50 1 d PD C 2 
H1AC H 0.4753(5) 0.8135(13) -0.2746(17) 0.103 Uiso 0.50 1 d PD D 2 
C1 C 0.39161(8) 0.7685(4) -0.0987(5) 0.0265(5) Uani 1 1 d D . . 
C2 C 0.35386(10) 0.8338(4) -0.0090(5) 0.0285(6) Uani 1 1 d . A . 
H2A H 0.3560 0.8900 0.1389 0.034 Uiso 1 1 calc R . . 
C3 C 0.31360(10) 0.8150(4) -0.1387(5) 0.0301(6) Uani 1 1 d . . . 
H3A H 0.2881 0.8591 -0.0786 0.036 Uiso 1 1 calc R A . 
C4 C 0.30978(11) 0.7318(4) -0.3583(5) 0.0326(6) Uani 1 1 d . A . 
C5 C 0.34741(11) 0.6667(4) -0.4391(5) 0.0330(6) Uani 1 1 d . . . 
H5A H 0.3454 0.6074 -0.5852 0.040 Uiso 1 1 calc R A . 
C6 C 0.38791(11) 0.6856(4) -0.3137(5) 0.0309(6) Uani 1 1 d . A . 
H6A H 0.4133 0.6416 -0.3751 0.037 Uiso 1 1 calc R . . 
C7 C 0.26896(12) 0.7100(4) -0.5160(5) 0.0327(6) Uani 1 1 d . . . 
H7A H 0.2681(13) 0.629(6) -0.677(7) 0.039 Uiso 1 1 d . . . 
 
loop_ 
 _atom_site_aniso_label 
 _atom_site_aniso_U_11 
 _atom_site_aniso_U_22 
 _atom_site_aniso_U_33 
 _atom_site_aniso_U_23 
 _atom_site_aniso_U_13 
 _atom_site_aniso_U_12 
Br1 0.0301(4) 0.0495(5) 0.0331(4) -0.0066(3) -0.0034(3) -0.0008(3) 
S1 0.092(2) 0.0618(19) 0.0525(18) 0.0206(13) -0.0430(15) -0.0405(16) 
C1A 0.031(4) 0.058(5) 0.112(9) -0.004(5) -0.011(4) 0.001(3) 
C1 0.0272(12) 0.0261(12) 0.0255(12) 0.0011(10) 0.0000(10) 0.0001(10) 
C2 0.0388(14) 0.0220(11) 0.0259(12) -0.0004(9) 0.0088(10) 0.0013(10) 
C3 0.0312(13) 0.0230(12) 0.0375(15) 0.0062(10) 0.0092(11) 0.0025(9) 
C4 0.0355(15) 0.0243(12) 0.0363(15) 0.0100(11) -0.0029(12) -0.0041(11) 
C5 0.0486(17) 0.0273(13) 0.0225(12) -0.0002(10) 0.0008(11) -0.0073(12) 
C6 0.0359(14) 0.0286(13) 0.0293(13) -0.0013(10) 0.0080(11) -0.0007(10) 
C7 0.0437(17) 0.0276(14) 0.0268(13) 0.0002(10) 0.0041(12) -0.0016(11) 
 
_geom_special_details 
; 
 All esds (except the esd in the dihedral angle between two l.s. planes) 
 are estimated using the full covariance matrix.  The cell esds are taken 
 into account individually in the estimation of esds in distances, angles 
 and torsion angles; correlations between esds in cell parameters are only 
 used when they are defined by crystal symmetry.  An approximate (isotropic) 
 treatment of cell esds is used for estimating esds involving l.s. planes. 
; 
 
loop_ 
 _geom_bond_atom_site_label_1 
 _geom_bond_atom_site_label_2 
 _geom_bond_distance 
 _geom_bond_site_symmetry_2 
 _geom_bond_publ_flag 
Br1 C1 1.911(3) . ? 
S1 C1A 1.7343(19) . ? 
S1 C1 1.7433(19) . ? 
C1A C1A 1.784(6) 2_654 ? 
C1A H1AA 0.9599(10) . ? 
C1A H1AB 0.9599(10) . ? 
C1A H1AC 0.9599(10) . ? 
C1 C6 1.384(4) . ? 
C1 C2 1.410(4) . ? 
C2 C3 1.386(4) . ? 
C2 H2A 0.9500 . ? 
C3 C4 1.410(4) . ? 
C3 H3A 0.9500 . ? 
C4 C5 1.383(5) . ? 
C4 C7 1.482(4) . ? 
C5 C6 1.382(5) . ? 
C5 H5A 0.9500 . ? 
C6 H6A 0.9500 . ? 
C7 C7 1.334(7) 7_564 ? 
C7 H7A 1.10(4) . ? 
 
loop_ 
 _geom_angle_atom_site_label_1 
 _geom_angle_atom_site_label_2 
 _geom_angle_atom_site_label_3 
 _geom_angle 
 _geom_angle_site_symmetry_1 
 _geom_angle_site_symmetry_3 
 _geom_angle_publ_flag 
C1A S1 C1 108.1(2) . . ? 
S1 C1A C1A 166.20(17) . 2_654 ? 
S1 C1A H1AA 112.2(8) . . ? 
C1A C1A H1AA 66.9(8) 2_654 . ? 
S1 C1A H1AB 109.4(9) . . ? 
C1A C1A H1AB 83.1(9) 2_654 . ? 
H1AA C1A H1AB 109.5(2) . . ? 
S1 C1A H1AC 106.5(10) . . ? 
C1A C1A H1AC 62.6(10) 2_654 . ? 
H1AA C1A H1AC 109.5(2) . . ? 
H1AB C1A H1AC 109.5(2) . . ? 
C6 C1 C2 119.6(2) . . ? 
C6 C1 S1 116.7(2) . . ? 
C2 C1 S1 123.6(2) . . ? 
C6 C1 Br1 124.1(2) . . ? 
C2 C1 Br1 116.2(2) . . ? 
S1 C1 Br1 7.66(11) . . ? 
C3 C2 C1 119.3(3) . . ? 
C3 C2 H2A 120.3 . . ? 
C1 C2 H2A 120.3 . . ? 
C2 C3 C4 121.1(3) . . ? 
C2 C3 H3A 119.4 . . ? 
C4 C3 H3A 119.4 . . ? 
C5 C4 C3 117.9(3) . . ? 
C5 C4 C7 116.0(3) . . ? 
C3 C4 C7 126.1(3) . . ? 
C4 C5 C6 121.9(3) . . ? 
C4 C5 H5A 119.0 . . ? 
C6 C5 H5A 119.0 . . ? 
C5 C6 C1 120.1(3) . . ? 
C5 C6 H6A 120.0 . . ? 
C1 C6 H6A 120.0 . . ? 
C7 C7 C4 124.3(4) 7_564 . ? 
C7 C7 H7A 114(2) 7_564 . ? 
C4 C7 H7A 122(2) . . ? 
 
loop_ 
 _geom_torsion_atom_site_label_1 
 _geom_torsion_atom_site_label_2 
 _geom_torsion_atom_site_label_3 
 _geom_torsion_atom_site_label_4 
 _geom_torsion 
 _geom_torsion_site_symmetry_1 
 _geom_torsion_site_symmetry_2 
 _geom_torsion_site_symmetry_3 
 _geom_torsion_site_symmetry_4 
 _geom_torsion_publ_flag 
C1 S1 C1A C1A 93.4(13) . . . 2_654 ? 
C1A S1 C1 C6 10.1(4) . . . . ? 
C1A S1 C1 C2 -169.2(3) . . . . ? 
C1A S1 C1 Br1 175.7(14) . . . . ? 
C6 C1 C2 C3 -0.5(4) . . . . ? 
S1 C1 C2 C3 178.7(3) . . . . ? 
Br1 C1 C2 C3 -179.1(2) . . . . ? 
C1 C2 C3 C4 0.1(4) . . . . ? 
C2 C3 C4 C5 0.9(4) . . . . ? 
C2 C3 C4 C7 -177.7(3) . . . . ? 
C3 C4 C5 C6 -1.6(4) . . . . ? 
C7 C4 C5 C6 177.2(3) . . . . ? 
C4 C5 C6 C1 1.2(4) . . . . ? 
C2 C1 C6 C5 -0.1(4) . . . . ? 
S1 C1 C6 C5 -179.4(3) . . . . ? 
Br1 C1 C6 C5 178.3(2) . . . . ? 
C5 C4 C7 C7 -168.9(4) . . . 7_564 ? 
C3 C4 C7 C7 9.8(6) . . . 7_564 ? 
 
_diffrn_measured_fraction_theta_max    0.979 
_diffrn_reflns_theta_full              25.00 
_diffrn_measured_fraction_theta_full   0.999 
_refine_diff_density_max    1.690 
_refine_diff_density_min   -0.908 
_refine_diff_density_rms    0.107
